# Supplementary material for: The Impact of Melatonin Supplementation and NLRP3 Inflammasome Deletion on Age-Accompanied Cardiac Damage
Source: MDPI journal article supplement (doi:10.3390/antiox10081269), 2021-08-10
Supplement: s1 [file s1]

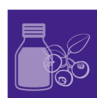

# Supplementary Materials: The Impact of Melatonin Supplementation and NLRP3 Inflammasome Deletion on Age-Accompanied Cardiac Damage

Ramy K. A. Sayed <sup>1,2,†</sup>, Marisol Fernández-Ortiz <sup>1,†</sup>, Ibtissem Rahim <sup>3</sup>, José Fernández-Martínez <sup>1</sup>, Paula Aranda-Martínez <sup>1</sup>, Iryna Rusanova <sup>1,4</sup>, Laura Martínez-Ruiz <sup>1</sup>, Reem M. Alsaadawy <sup>5</sup>, Germaine Escames <sup>1,4</sup> and Darío Acuña-Castroviejo <sup>1,4,6,\*</sup>

<sup>1</sup> Centro de Investigación Biomédica, Departamento de Fisiología, Facultad de Medicina, Instituto de Biotecnología, Parque Tecnológico de Ciencias de la Salud, Universidad de Granada, 18016 Granada, Spain; ramy.kamal@vet.sohag.edu.eg (R.K.A.S.); sol92@correo.ugr.es (M.F.-O.); josefermar@ugr.es (J.F.-M.); ampaula@correo.ugr.es (P.A.-M.); irusanova@ugr.es (I.R.); lauramartinezruiz8@gmail.com (L.M.-R.); gescames@ugr.es (G.E.)

<sup>2</sup> Department of Anatomy and Embryology, Faculty of Veterinary Medicine, Sohag University, Sohag 82524, Egypt

<sup>3</sup> Département de Biologie et Physiologie Cellulaire, Faculté des Sciences de la Nature et de la Vie, Université Blida 1, Blida 09000, Algeria; rahim.im15@gmail.com

<sup>4</sup> CIBERfes, Ibs.Granada, 18016 Granada, Spain

<sup>5</sup> Department of Zoonoses, Faculty of Veterinary Medicine, Assiut University, Assiut 71526, Egypt; reem.barbary@vet.au.edu.eg

<sup>6</sup> UGC de Laboratorios Clínicos, Hospital Universitario San Cecilio, 18016 Granada, Spain

\* Correspondence: dacuna@ugr.es; Tel.: +34-95-824-1000 (ext. 20169)

† Authors contributed equally.

**Table S1.** List of primers used in RT-PCR assay.

| Gene Symbol    | Gene Description                                  | Forward Primer              | Reverse Primer             |
|----------------|---------------------------------------------------|-----------------------------|----------------------------|
| <i>B-MHC</i>   | Myosin, heavy polypeptide 7, cardiac muscle, beta | CAAGCGGAAGCTGGAG<br>GGA     | CCTCGATGCGTGCCTGA<br>AG    |
| <i>IL-1α</i>   | Interleukin 1 alpha                               | AGCCCGTGTTGCTGAAG<br>GAGT   | CCGACTTTGTTCTTTGGT<br>GGCA |
| <i>IL-6</i>    | Interleukin 6                                     | AAAGCCAGAGTCCTTCA<br>GAGAGA | GGAGAGCATTGGAAATT<br>GGGTA |
| <i>TNF-α</i>   | Tumor necrosis factor alpha                       | AGCCCACGTCGTAGCAA<br>ACC    | GGTGAGGAGCACGTAGT<br>CGG   |
| <i>β-actin</i> | Beta-actin                                        | GCTGTCCCTGTATGCCT<br>CTG    | CGCTCGTTGCCAATAGT<br>GATG  |
